# Supplementary material
Source: ML conference proceedings conference paper supplement (https://proceedings.neurips.cc/paper_files/paper/2022/hash/b84b9d1fe05c5e74d8f9466f063327a5-Abstract.html)
Supplement: Supplementary file 1 [file b84b9d1fe05c5e74d8f9466f063327a5-Supplemental-Conference.zip]

Archive with 2 entries (2 files):
- demo.mp4
- _NeurIPS_2022_CameraReady_Active-Camera_Appendix.pdf
